# Supplementary material for: Extraction of Acetogenins Using Thermosonication-Assisted Extraction from Annona muricata Seeds and Their Antifungal Activity
Source: MDPI journal article supplement (doi:10.3390/molecules27186045), 2022-09-16
Supplement: s1 [file s1]

# Extraction of Acetogenins Using Thermosonication-Assisted Extraction from *Annona muricata* Seeds and Their Antifungal Activity

Brandon Alexis López-Romero <sup>1</sup>, Gabriel Luna-Bárceñas <sup>2</sup>, María de Lourdes García-Magaña <sup>1</sup>, Luis Miguel Anaya-Esparza <sup>3</sup>, Luis Gerardo Zepeda-Vallejo <sup>4</sup>, Ulises Miguel López-García <sup>1</sup>, Rosa Isela Ortiz-Basurto <sup>1</sup>, Gabriela Aguilar-Hernández <sup>3,\*</sup>, Alejandro Pérez-Larios <sup>3,\*</sup> and Efigenia Montalvo-González <sup>1,\*</sup>

<sup>1</sup> Laboratorio Integral de Investigación en Alimentos, Tecnológico Nacional de México/Instituto Tecnológico de Tepic, Av. Tecnológico 2595, Lagos del Country, Tepic 63175, Nayarit, Mexico

<sup>2</sup> Centro de Investigación y de Estudios Avanzados, Libramiento Norponiente 2000, Fracc. Real de Juriquilla, Santiago de Querétaro, Querétaro 76230, Mexico

<sup>3</sup> División de Ciencias Agropecuarias e Ingenierías, Centro Universitario de los Altos, Universidad de Guadalajara, Av. Rafael Casillas Aceves 1200, Guadalajara 47600, Jalisco, Mexico

<sup>4</sup> Departamento de Química Orgánica, Escuela Nacional de Ciencias Biológicas, Instituto Politécnico Nacional, Av. Prolongación de Carpio y Plan de Ayala s/n, Col. Santo Tomás, Delegación Miguel Hidalgo, Ciudad de Mexico 11340, Mexico

\* Correspondence: gaby.mca2017@gmail.com (G.A.-H.); alarios@cualtos.udg.mx (A.P.-L.); emontalvo@ittpic.edu.mx (E.M.-G.); Tel.: +52-311-211-9400 (E.M.-G.)

**Table S1.** Temperature profile of the extraction medium using Box-Behnken design.

| Time (min) | Temperature (60°C) |
|------------|--------------------|
| 0          | 59 ± 1             |
| 10         | 59 ± 2             |
| 20         | 58 ± 2             |
| 30         | 59 ± 2             |
| 40         | 60 ± 2             |
| 50         | 59 ± 2             |
| Time (min) | Temperature (50°C) |
| 0          | 50 ± 1             |
| 10         | 49 ± 2             |
| 20         | 49 ± 2             |
| 30         | 48 ± 2             |
| 40         | 50 ± 2             |
| 50         | 50 ± 2             |
| Time (min) | Temperature (40°C) |
| 0          | 40 ± 1             |
| 10         | 40 ± 2             |
| 20         | 40 ± 2             |
| 30         | 39 ± 2             |
| 40         | 38 ± 2             |
| 50         | 40 ± 2             |

Temperatures were controlled with a cold-water recirculating bath.
